# Supplementary material for: Foreign DNA detection in genome-edited potatoes by high-throughput sequencing
Source: PubMed Central journal article supplement (PMC10412624; doi:10.1038/s41598-023-38897-x), 2023-08-09
Supplement: 41598_2023_38897_MOESM1_ESM.pdf [file 41598_2023_38897_MOESM1_ESM.pdf]

# Supplementary information

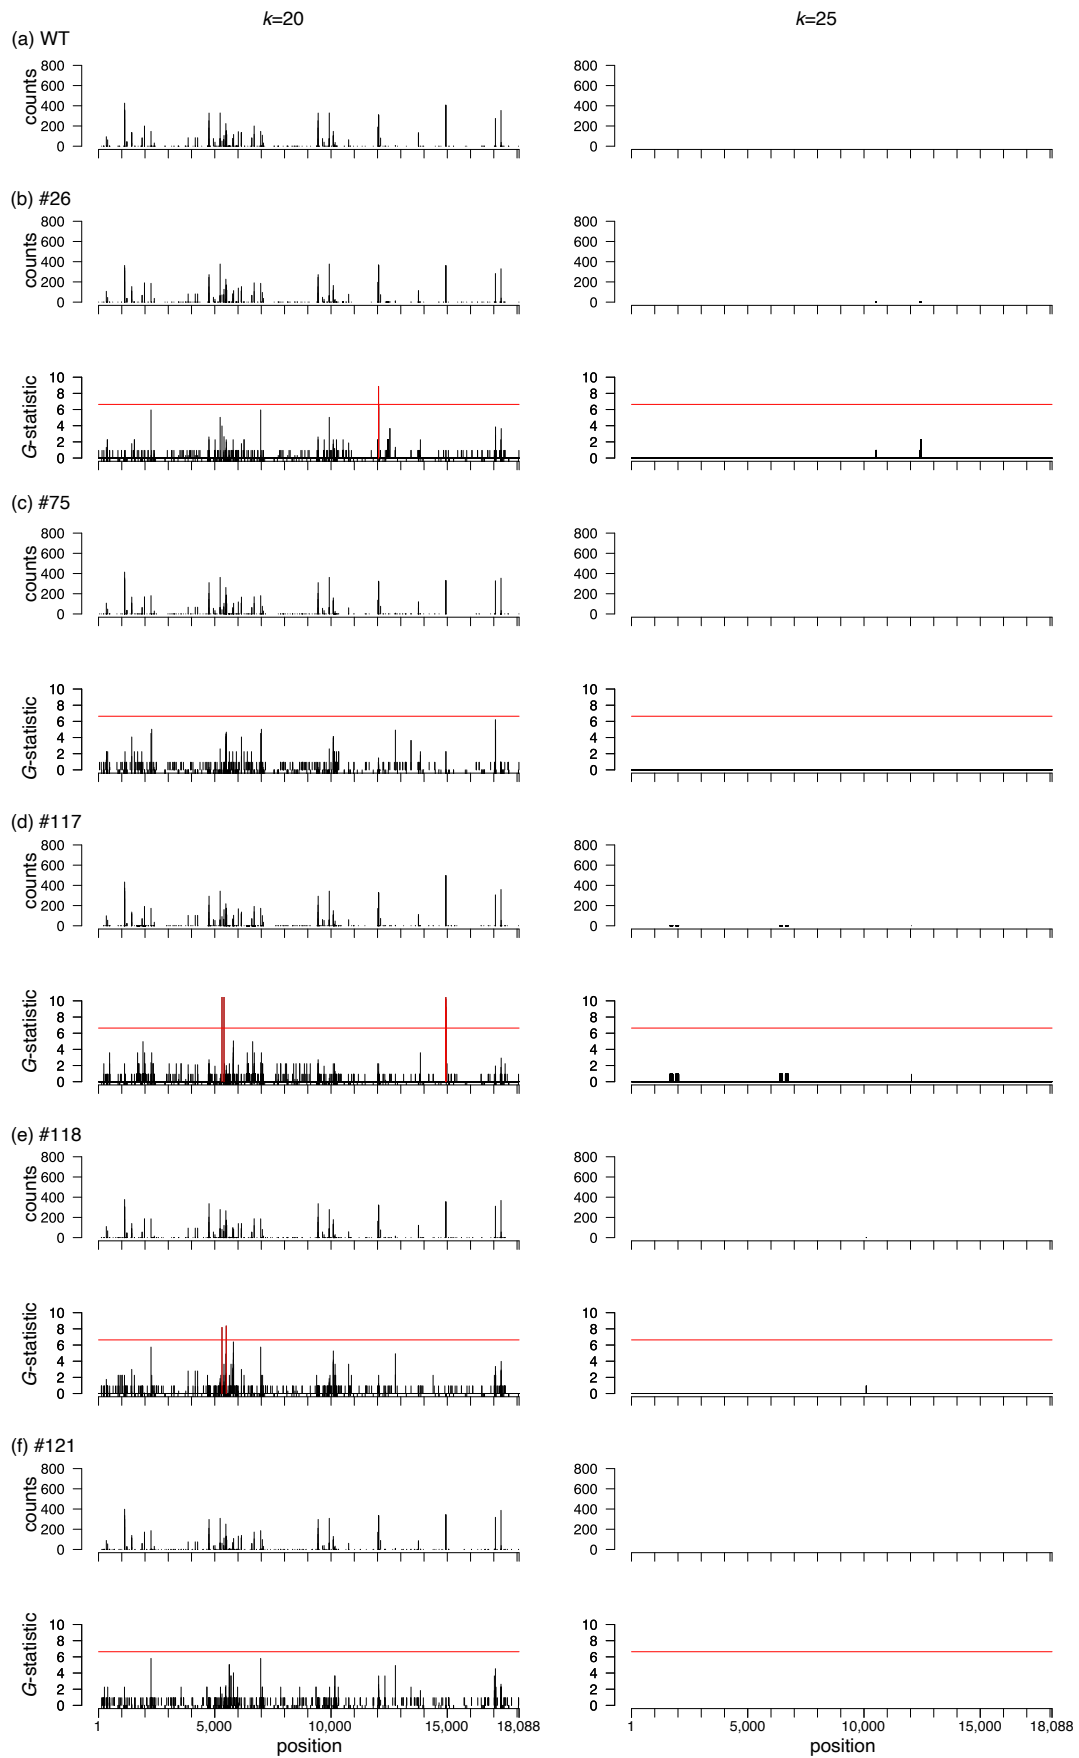

**Figure S1.** Detection of identical  $k$ -mers between the actual genome-edited potato genome and vector sequences.

Data obtained from the wild-type (WT) (a) and genome-edited potato lines not shown in Figure 1, #26 (b), #75 (c), #117 (d), #118(e), and #121 (f) are shown for  $k = 20$  (left) and  $k = 25$  (right). The results of the counts and  $G$ -statistic values (against the WT) at each position in the pYS\_026-SSR2\_C vector sequence used in genome-editing are shown in the vertical plots. The red horizontal line corresponds to the 1% significance level ( $G$ -values  $> 6.634$ ) and the vertical plots exceeding this line are shown in red. The results obtained by repeated NGS experiments are shown in Figure S2.

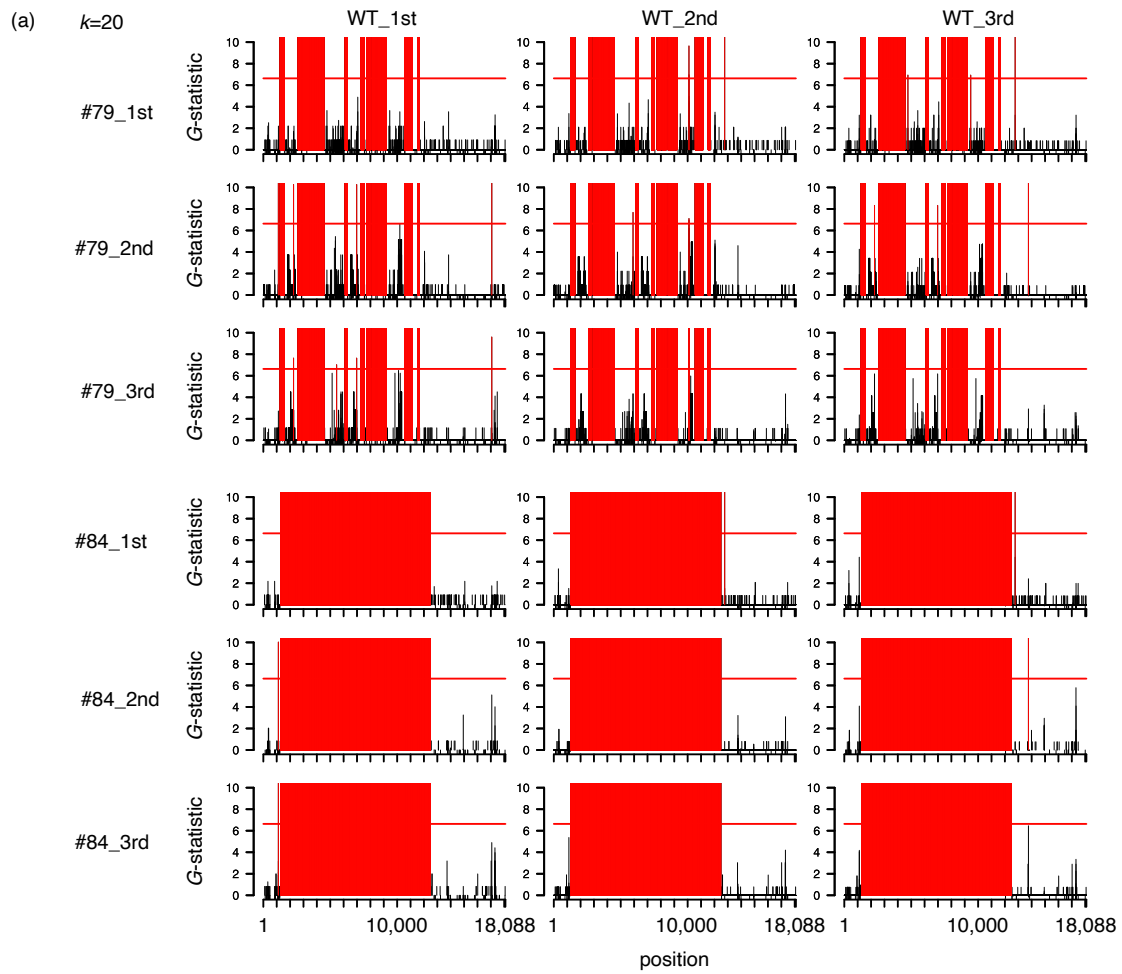

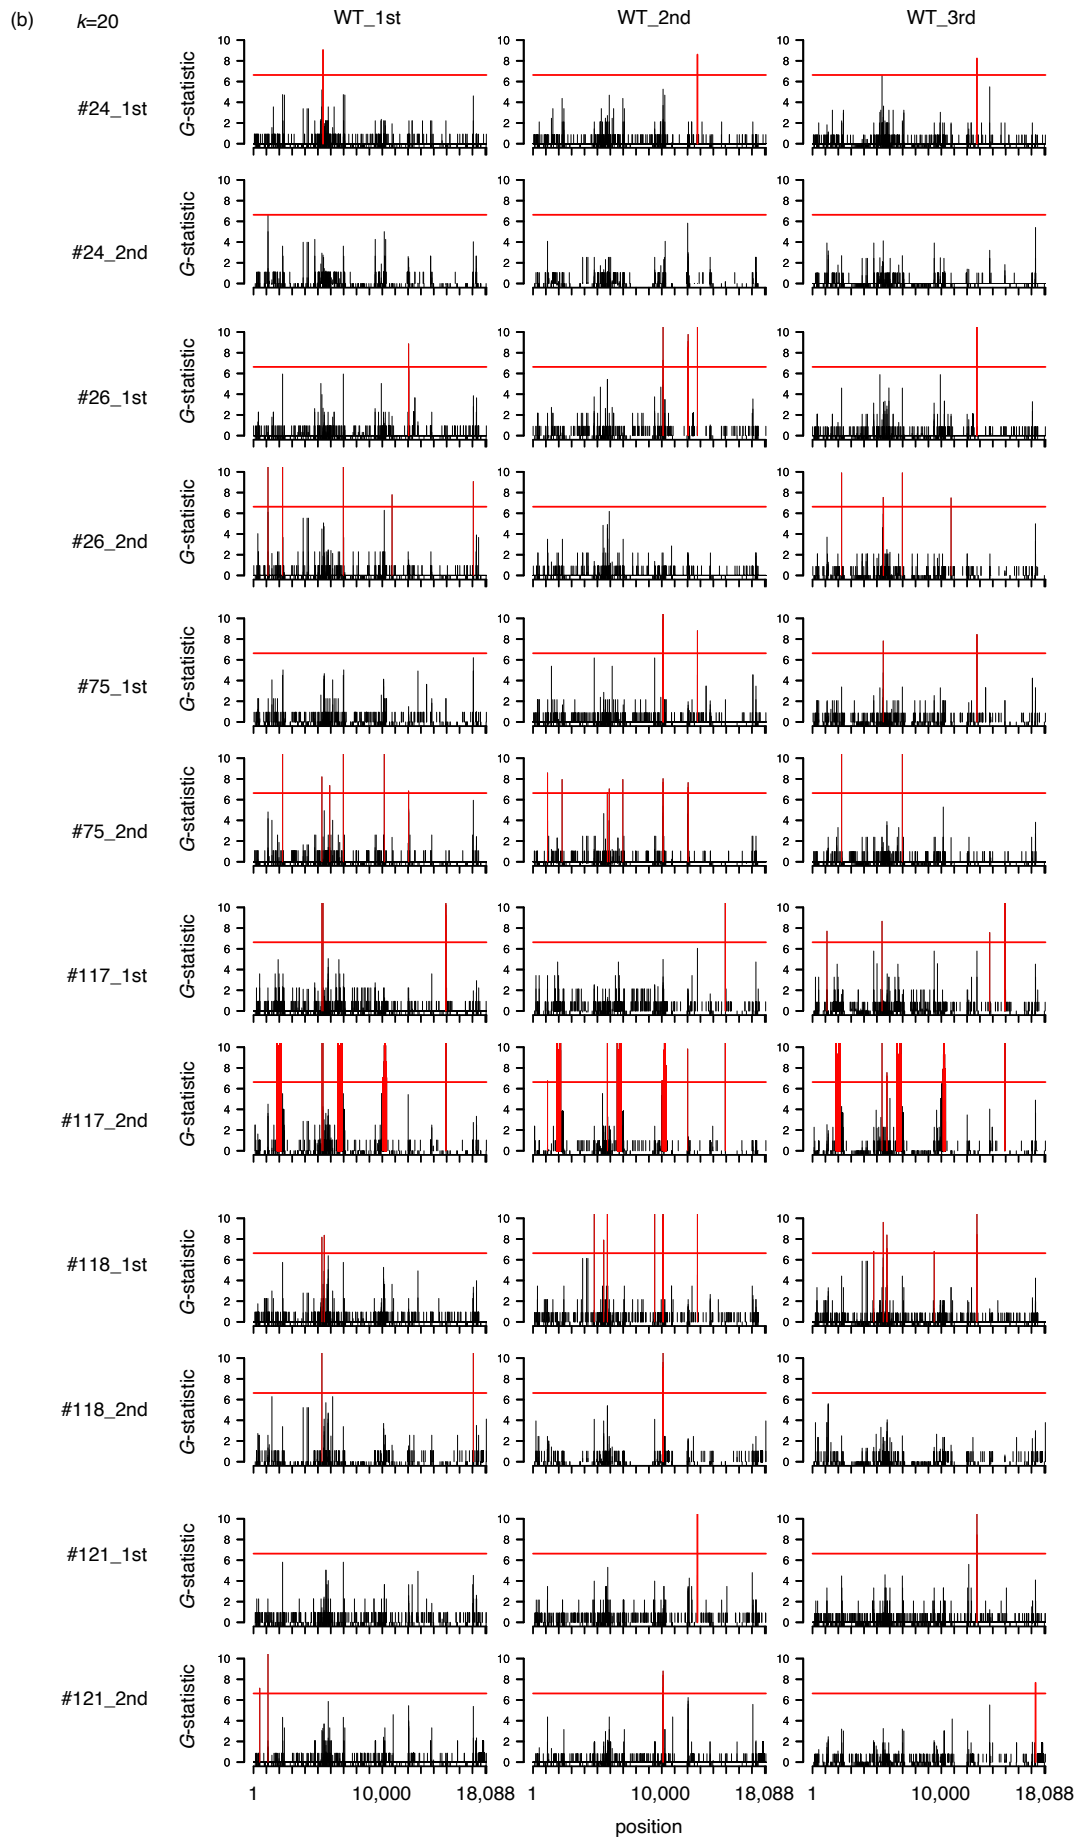

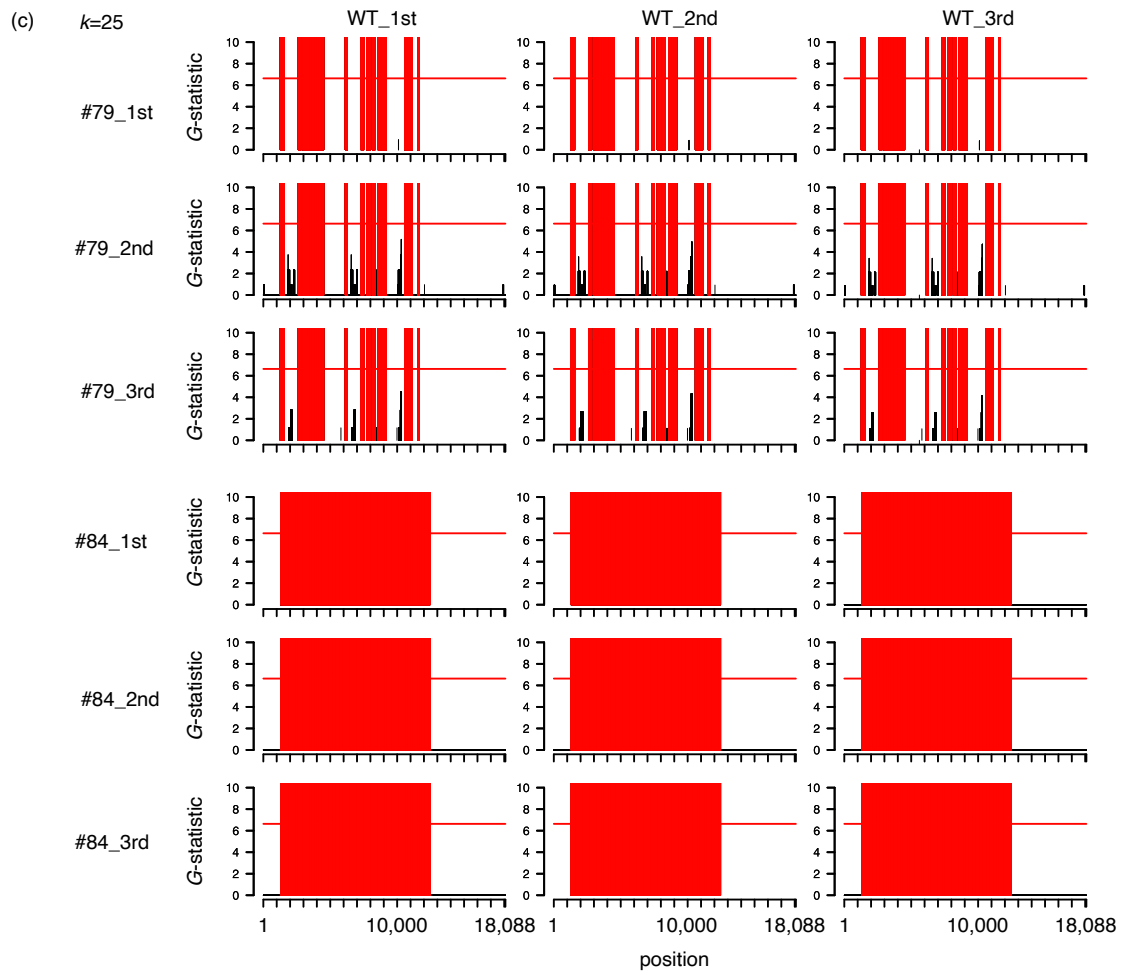

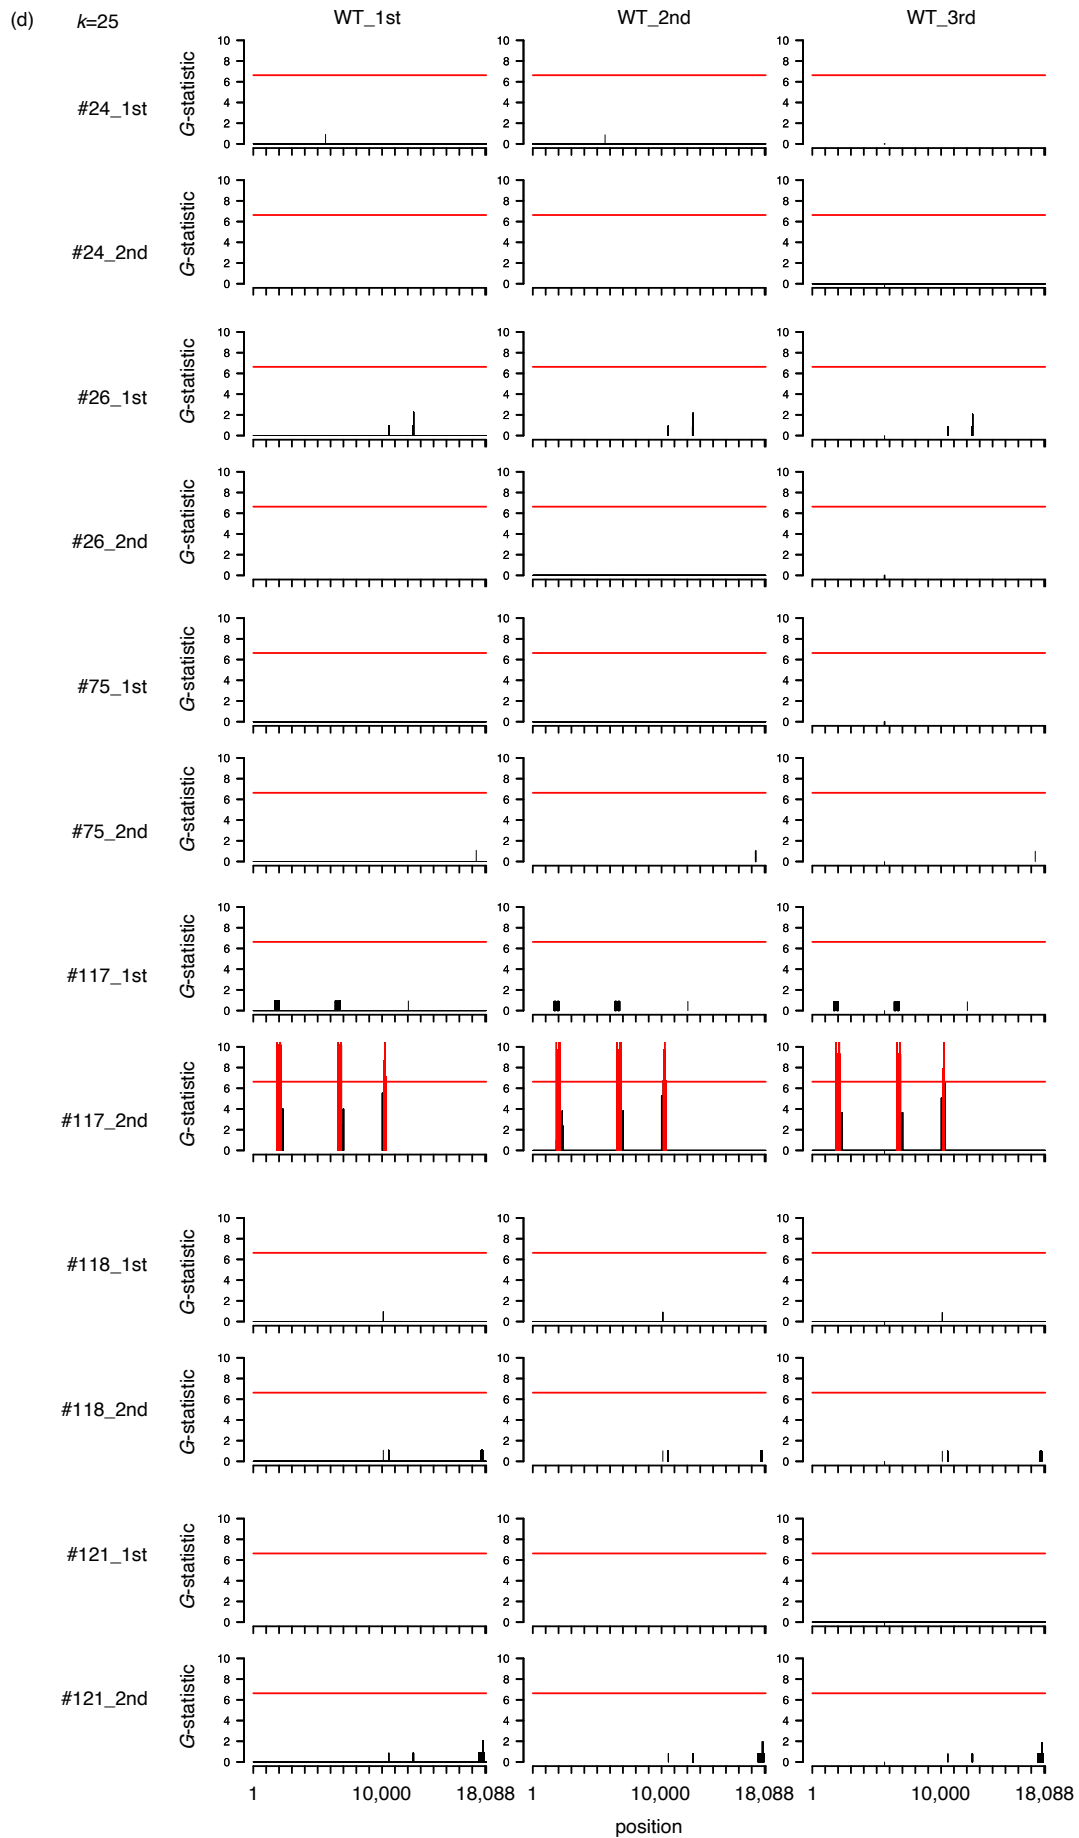

**Figure S2.** *k*-mer analysis using repeated real NGS data.

The result of *k*-mer analysis using repeated NGS data obtained from the wild-type (WT) and genome-edited potato lines are shown for  $k = 20$  (a, b) and  $k = 25$  (c, d). The result of *k*-mer analysis for genome-edited lines assessed as transgenic lines (#79 and #84) by *k*-mer analysis first using NGS data are shown in (a) and (c). The results of *k*-mer analysis for genome-edited lines assessed as having no transgenes (#24, #26, #75, #117, #118, and #121) first using NGS data are shown in (b) and (d). *G*-statistic values over 10 are omitted, and the raw data are shown in Data S1.

(a)

5' cgtgacaaagttggtatcatagccctaggttcattaatctcattgatatcgaaacgaggct  
agtagagtcttgcggaacggtacgaagacgtgactatgactgacttgatataat **ACATAGCGT**  
**TGGCTACCCGTGATATTGCTGAAGAGCTTGGCGGCGAATGGGCTGACCGCTTCCCTCGTGCTT**  
**TACGGTATCGCCGCTCCCGATTGCGAGCGCATCGCCTTCTATCGCCTTCTTGACGAGTTCTT**  
**CTGA**GCGGGACTCTGGGGTTgatttggttatgctgaatatgactgacttgatataatgtag  
gcatgacttggtgtccccctattatgttgtgcttaatggtaatgctaagtcggttaactcta  
gagatcccg3'

(b)

5'gggtggtggtgatttgtaaactggtgcgggatgataaggtggtggtgaagggtggtatggc  
ttctttggtggtgggggagatgagtattgataattagctgagctttcggaagctaagctaag  
tgacaa **gaaagacgacctgcggaaccaacaaggcaaacatcttccgcaatgagtgtagatgc**  
**gtccggctcggccgcagctcattgattccgaggccagctctatcaggagctcttgatTTTTG**  
**gacccgagcatcatcgtgcccttggctcttgagctggtgatggTTTTcgaaggcgaattcgag**  
**ttcgaggctgtcaaacaaacctgcaacatttcgatgaacttgggatgtgtcgtccgagtg**  
**tgagactaccgcgccgcaacgctcgtcaagggaatattgagactgataaagccgttctctggc**  
**gtatgcaggtcgaccacttcgccatcattgtagcgggtccagtagtgtagcggccaaagcagc**  
**gaacgctatgaagacaatggagcgcggtcgtgagaaatttcagctgtcgcacctgaggttc**  
**tcgggtcagcgttcagagagagcaatctgtttccagcgcctagcctgctcgcgaattttcc**  
**tgcttagcaacatcacctctgacgcggttcgacacgtatacgggtttctccaggccgtctgc**  
**ctccatgtcgatcgcctcgatcagactgtcgagaccgcggacaacagtgcgacgcaggttt**  
**cgggacgcgatccgataacctgtttcggcgggctggtggtatccgcgcattttccagaa**  
**gccatcacgagttccctcgcaccgggtgatgaatatcgtcacttctccagatagcgggtcaag**  
**ctcgcgatatcttgtcaaagaacttcagtatgcccgcgaatgcaccggcggcaatcagatca**  
**agaatgaaccacgacgaccggctcaaatgcaccgggataagcgggttaaacagcaacgccac**  
**gcaaatgaagccgaacacccaacctgtaaacgccttgtgctgtccgtactcgatgtaagcga**  
**agaacgctgcgaatgcagtgatgacgaggcgcaacagcgtgtagtagccatagggcaacgga**  
**aatatagcaatcactaatgctactgctggaaggagatgatgtggcgtggaatatggtcac**  
**gtaagcccccaaacatgtctatgaaaatcatctaattcacaacataagtttgaaagcag**  
**gcagatacaatctcttgtggagtacgctgcgctacaagtcagcagtgccgagcgggatgact**  
**aagccttattgtcaaggatatacgtgtatatgccgcttcaactcgatgaacgacggctttc**  
**attaggtctttaaggatcacgatatgttcgtcgtcaatcacgacatcttttccatcattgtc**  
**gcgcccgctgcgatgcacgaggtcatgccgcacgtgataatgtctagcattttcttctcgt**



gattttcgctctcaaacaagttcattttcagtacggccttgtaaaagacggccacgctggct  
aagtcgtgaaacgagaaacgctgcaaatagttcttgcttgacgtcgccacatagttggggtc  
cttggcgatgtcgataagtttaggttgattgttccgaagggcgggggtgcaccgacgagcg  
caagcagtttgctgctatcgttggtgacgatcttgatgagccggctgctcaagtacgcctca  
agtgaaataacatgctggagcgagatcattttgtggcacgctcggccaggcactcgctgcac  
ctgtcaagctggcggacggcagtagcacccttccatcgatcaggagaagttccacgaccag  
tttgctcacgatgtgggctgtagacaacgctgctgctgatggcggccgggacggccatcac  
tgaggcggcactgacggaaaagtcaggcaagccggcctggaaggcgctgccgtcctacttcg  
tctacggtgatggcgacaagaacataccggccgaggcactcgccttcatggctgaacgggca  
ggctcaaagcacacagtcgtcgcaaaaggtgcctctcacgtgggtgatggctcgcagccaga  
gggggtcgcagcccttattgaagaagcggcgaactaggctcgttcccgcgcagaagaccggc  
tctgcggtcggctcttctgcggaacgagacgggatcactcgttcggatcgcttcaaggcgtt  
ggaagcgtagacttccattactttcatcaacgaaaatccgatcaaaaaataatttgttcagt  
gtagtgaagacgtccaagcctagactggatttgccgataaggcgtctaataattcggcta  
gtggagaaggaaaatcgcaagctcccgtgcgattgctcctcgatcctcgcaaccgaccgtt  
atcaaccagacagtgtcaggagttgtcacgcctttgttactagaaggccaTCAAACTGAT  
AGTTTAACTGAAGGCGGAAACGACAATCTGATCCTGGCGAAAGGGGGATGTGCTGCAAGG  
CGATTAAGttgggtaaCGCCAGGGTTTTCCAGTCACGACGTTGTAAAACGACGGCCAGTGC  
CAAGCTTGCAATGCCTGCAGGTCCCCAGATTAGCCTTTTCAATTTTCAGAAAGAATGCTAACCC  
ACAGATGGTTAGAGAGGCTTACGCAGCAGGTCTCATCAAGACGATCTACCCGAGCAATAATC  
TCCAggaaatcaataccttcccaagaaggtaaagatgcagtcaaaagattcaggactaac  
tagttgatggctcctgctcatcgtaaagcaggtcacgatcgcgacgaaggcttcttgggtcat  
catctatactccggtcattcaatcaggaaatgcttgcgaggcgagcattccggttggccgcc  
tgacgctccgggtcagggtcgaggggtggcgaaatcaaggcttggtgtgtagcgtgttgcg  
attatcgaagacttgcgcaactgtaccgaattcgaccacctcaccttctgcatgaccatga  
cgtagtctgcaaaatcgcgcacgaggggaggtcatggcgatgaagatgaaggcaattccc  
atctctcggcgcagcttgctgagcagcctcaccacctgcgctgcaccgatacatcaagtgc  
cgaaacggcctcgtcgcagacgatcagttgcggtcaagcgcaagtgcgagcaatggcga  
tacgctgacgctggccaccggagaactgatgcgggtagcgaccatagttcgggacgacgc  
ccgaccgttccagcaattctgcgggcgcgtgcacgccacttcgccttgggcagaatctcgg  
gtggatgacccaggcct3'

**Figure S3.** Predicted neighbor sequence of foreign nucleotides (partial *NPTII*) in genome-editing line #79 based on NGS data.

(a) Predicted neighbor sequence of a small DNA fragment (approximately 150 bp) from the vector position 11,534–11,667 in the potato genome. Underlined capital letters indicate the homologous sequence to pYS\_026-SSR2\_C, the TALEN expression vector used in the genome editing. The partial *NPTII* sequence in pYS\_026SSR2-C detected in the *k*-mer analysis is highlighted in green. Sequences homologous to potato chromosomal sequences (exact loci are unknown) are shown by red letters.

(b) Predicted neighbor sequence of a DNA fragment from the vector position 1,268–1,581 in the potato genome. Underlined capital letters indicate the homologous sequence to pYS\_026-SSR2\_C, the TALEN expression vector used in the genome editing. The partial RB sequence is highlighted in light blue; the partial 35S promoter sequence is highlighted by dark blue; sequences homologous to potato chromosomal sequences (possibly located on chromosome 4) are shown by red letters; and sequences homologous to the *Agrobacterium* chromosomal plasmid are highlighted in yellow.

**Table S1.** Primers used in this study.

| Name              | Sequence(5' to 3')             | Note                    |
|-------------------|--------------------------------|-------------------------|
| pY1087/11534N-For | TGACAAAGTTGGTATCATAGCCCTAGG    | target: potato genome   |
| pY1088/11667N-Rev | GATCTCTAGAGTTACCGACTTAGCATTACC | target: potato genome   |
| pY1089/11534-For  | TAGCGTTGGCTACCCGTGATATTGC      | target: vector sequence |
| pY1090/11667-Rev  | CCGCTCAGAAGAACTCGTCAAGAAGG     | target: vector sequence |

**Table S2.** Summary of NGS data acquisition.

| Sample          | Sample ID      | Total read bases (Gb) | Depth (x) | Preprocessed Total read bases (Gb) | Preprocessed Depth (x) | Note                                    |
|-----------------|----------------|-----------------------|-----------|------------------------------------|------------------------|-----------------------------------------|
| Wild-Type Sassy | Sassy_NT       | 147.03                | 43.6      | 130.44                             | 38.6                   | 1st NGS data for WT                     |
|                 | Sassy_NT2      | 137.62                | 40.8      | 132.12                             | 39.1                   | 2nd NGS data for WT                     |
|                 | Sassy_NT3      | 129.60                | 38.4      | 123.73                             | 36.7                   | 3rd NGS data for WT                     |
| #24             | Sassy_NS_24    | 147.62                | 43.7      | 131.96                             | 39.1                   | 1st NGS data for #24                    |
|                 | Sassy_NS_24_2  | 113.51                | 33.6      | 108.51                             | 32.1                   | 2nd NGS data for #24                    |
| #26             | Sassy_NS_26    | 142.26                | 42.1      | 129.05                             | 38.2                   | 1st NGS data for #26                    |
|                 | Sassy_NS_26_2  | 141.16                | 41.8      | 135.39                             | 40.1                   | 2nd NGS data for #26                    |
| #75             | Sassy_NS_75    | 143.08                | 42.4      | 129.25                             | 38.3                   | 1st NGS data for #75                    |
|                 | Sassy_NS_75_2  | 117.56                | 34.8      | 112.78                             | 33.4                   | 2nd NGS data for #75                    |
| #79             | Sassy_NS_79    | 148.70                | 44.0      | 133.49                             | 39.5                   | 1st NGS data for #79                    |
|                 | Sassy_NS_79_2  | 137.67                | 40.8      | 131.63                             | 39.0                   | 2nd NGS data for #79                    |
|                 | Sassy_NS_79_3  | 104.04                | 30.8      | 99.65                              | 29.5                   | 3rd NGS data for #79                    |
| #117            | Sassy_NS_117   | 145.69                | 43.2      | 131.90                             | 39.1                   | 1st NGS data for #117                   |
|                 | Sassy_NS_117_2 | 124.78                | 37.0      | 120.42                             | 35.7                   | 2nd NGS data for #117                   |
| #118            | Sassy_NS_118   | 142.89                | 42.3      | 123.61                             | 36.6                   | 1st NGS data for #118                   |
|                 | Sassy_NS_118_2 | 119.40                | 35.4      | 114.94                             | 34.0                   | 2nd NGS data for #118                   |
| #121            | Sassy_NS_121   | 142.70                | 42.3      | 118.80                             | 35.2                   | 1st NGS data for #121                   |
|                 | Sassy_NS_121_2 | 162.23                | 48.1      | 155.99                             | 46.2                   | 2nd NGS data for #121                   |
| #84             | Sassy_NS_84    | 150.45                | 44.6      | 133.64                             | 39.6                   | 1st NGS data for #84 (positive control) |
|                 | Sassy_NS_84_2  | 166.23                | 49.2      | 159.34                             | 47.2                   | 2nd NGS data for #84 (positive control) |
|                 | Sassy_NS_84_3  | 170.61                | 50.5      | 163.18                             | 48.3                   | 3rd NGS data for #84 (positive control) |

Sample : plant sample

Sample ID : NGS\_data

Total read bases : Total number of bases sequenced (non-preprocessed raw data)

Depth: coverage of non-preprocessed raw data to tetraploid potato genome (844 Mbp)

Preprocessed Total read bases (bp): Total number of bases preprocessed by fastp (preprocessed data)

Preprocessed Depth: coverage of preprocessed data to tetraploid potato genome (844 Mbp)

**Table S3.** Detected plasmid sequence in #117 (second NGS dataset).

| Vector position in pYS_026-SSR2_C | k-mer sequence             | Read containing k-mer from #117 2nd NGS | Identity to pYS_026-SSR2_C (used for genome editing) | Identity to pBYR2HS-eGFP (possible contaminant) |
|-----------------------------------|----------------------------|-----------------------------------------|------------------------------------------------------|-------------------------------------------------|
| 1188                              | AACATGGTGGAGCACGACACTTG    | 1                                       | 142/166 (85.5%)                                      | 151/151 (100.0%)                                |
|                                   |                            | 2                                       | 138/152 (90.8%)                                      | 151/151 (100.0%)                                |
|                                   |                            | 3                                       | 142/166 (85.5%)                                      | 151/151 (100.0%)                                |
|                                   |                            | 4                                       | 135/180 (75.0%)                                      | 151/151 (100.0%)                                |
|                                   |                            | 5                                       | 140/287 (48.8%)                                      | 150/151 (99.3%)                                 |
|                                   |                            | 6                                       | 149/149 (100.0%)                                     | 151/151 (100.0%)                                |
|                                   |                            | 7                                       | 140/176 (79.5%)                                      | 151/151 (100.0%)                                |
|                                   |                            | 8                                       | 148/149 (99.3%)                                      | 150/151 (99.3%)                                 |
| 2136                              | TCAAAGCAAGTGGATTGATGTGATA  | 1                                       | 142/166 (85.5%)                                      | 151/151 (100.0%)                                |
|                                   |                            | 2                                       | 142/166 (85.5%)                                      | 151/151 (100.0%)                                |
|                                   |                            | 3                                       | 148/151 (98.0%)                                      | 148/151 (98.0%)                                 |
|                                   |                            | 4                                       | 148/151 (98.0%)                                      | 148/151 (98.0%)                                 |
|                                   |                            | 5                                       | 140/287 (48.8%)                                      | 150/151 (99.3%)                                 |
|                                   |                            | 6                                       | 140/176 (79.5%)                                      | 151/151 (100.0%)                                |
|                                   |                            | 7                                       | 151/151 (100.0%)                                     | 151/151 (100.0%)                                |
| 10138                             | GCTAGCTTGTGTGCTTAAAGTTTGTG | 1                                       | 151/151 (100.0%)                                     | 151/151 (100.0%)                                |
|                                   |                            | 2                                       | 151/151 (100.0%)                                     | 151/151 (100.0%)                                |
|                                   |                            | 3                                       | 151/151 (100.0%)                                     | 151/151 (100.0%)                                |
|                                   |                            | 4                                       | 151/151 (100.0%)                                     | 151/151 (100.0%)                                |
|                                   |                            | 5                                       | 151/151 (100.0%)                                     | 151/151 (100.0%)                                |
| 10326                             | GGAATATGATTAAGATAAGGAATT   | 1                                       | 129/225 (57.3%)                                      | 151/151 (100.0%)                                |
|                                   |                            | 2                                       | 140/179 (78.2%)                                      | 151/151 (100.0%)                                |
|                                   |                            | 3                                       | 108/229 (47.2%)                                      | 151/151 (100.0%)                                |
|                                   |                            | 4                                       | 137/176 (77.8%)                                      | 151/151 (100.0%)                                |
|                                   |                            | 5                                       | 124/225 (55.1%)                                      | 151/151 (100.0%)                                |

Identities were calculated by local alignment program (water) in EMBOSS explorer (<https://www.bioinformatics.nl/emboss-explorer/>)

**Data S1.** Detected  $k$ -mer sequence for 20-mer analysis.

**Data S2.** Detected  $k$ -mer sequence for 25-mer analysis.

**Data S3.**  $k$ -mer analysis result.
